# Supplementary material for: Nitrate in Maternal Drinking Water during Pregnancy and Measures of Male Fecundity in Adult Sons
Source: MDPI journal article supplement (doi:10.3390/ijerph192114428), 2022-11-03
Supplement: s1 [file s1]

## Supplementary Materials

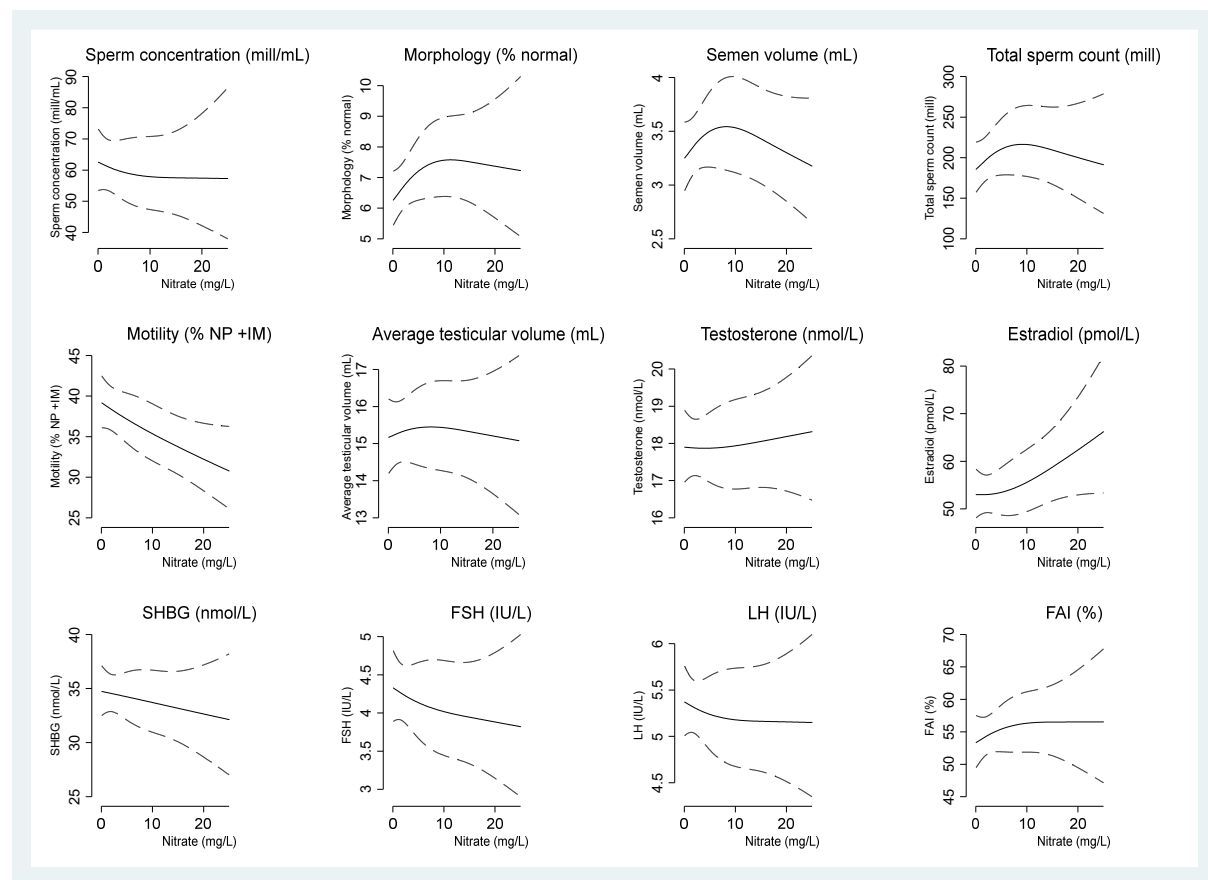

**Figure S1.** Spline plots with three knots (10th, 50th, 90th percentiles) and 95% confidence intervals showing the association between prenatal exposure to nitrate and semen characteristics, testes volume and reproductive hormones.

*The spline plots are made for a reference son who had an abstinence time of 2-3 days, delivered the semen sample at the clinic, reported no spillage, had the semen sample analyzed <60 minutes from delivery and had the blood test in the afternoon. The reference sons' mother were a non-smoker during pregnancy and aged 30 years at delivery. The highest educational level of the reference sons' parents were high-grade professional.*

**Table S1.** Further adjustment of the main model for maternal pre-pregnancy BMI and population density. Relative difference in percent in semen quality characteristics, testes volume and reproductive hormones in adult sons in relation to nitrate concentration in maternal drinking water.

| Semen quality characteristics                             | Nitrate mg/L       | n <sup>a</sup> | Crude | Adjusted for maternal pre-pregnancy BMI <sup>b,c</sup> | Adjusted for population density <sup>b,d</sup> |
|-----------------------------------------------------------|--------------------|----------------|-------|--------------------------------------------------------|------------------------------------------------|
| Volume (mL) <sup>e</sup>                                  |                    | >790           |       |                                                        |                                                |
|                                                           | ≤2                 |                | ref   | ref                                                    | ref                                            |
|                                                           | 2-≤5               |                | -3%   | 0% (-7;7)                                              | 0% (-7;7)                                      |
|                                                           | >5                 |                | 7%    | 8% (-4;22)                                             | 7% (-5;20)                                     |
|                                                           | Per 1 mg/L nitrate |                | 0%    | 0% (-1;1)                                              | 0% (-1;1)                                      |
| Concentration (million/mL) <sup>f</sup>                   |                    | >950           |       |                                                        |                                                |
|                                                           | ≤2                 |                | ref   | ref                                                    | ref                                            |
|                                                           | 2-≤5               |                | -10%  | -6% (-16;6)                                            | -6% (-16;6)                                    |
|                                                           | >5                 |                | -4%   | 0% (-16;20)                                            | -1% (-17;19)                                   |
|                                                           | Per 1 mg/L nitrate |                | -1%   | 0% (-2;1)                                              | 0% (-2;1)                                      |
| Total sperm count (million) <sup>e</sup>                  |                    | >790           |       |                                                        |                                                |
|                                                           | ≤2                 |                | ref   | ref                                                    | ref                                            |
|                                                           | 2-≤5               |                | -6%   | 2% (-10;16)                                            | 2% (-10;16)                                    |
|                                                           | >5                 |                | 16%   | 16% (-3;40)                                            | 15% (-4;39)                                    |
|                                                           | Per 1 mg/L nitrate |                | 0%    | 0% (-1;2)                                              | 0% (-1;2)                                      |
| Normal morphology (%) <sup>g</sup>                        |                    | >930           |       |                                                        |                                                |
|                                                           | ≤2                 |                | ref   | ref                                                    | ref                                            |
|                                                           | 2-≤5               |                | -3%   | -2% (-11;8)                                            | -2% (-12;8)                                    |
|                                                           | >5                 |                | 19%   | 21% (4;42)                                             | 24% (6;46)                                     |
|                                                           | Per 1 mg/L nitrate |                | 1%    | 1% (-1;2)                                              | 1% (-1;2)                                      |
| Motility, non-progressive and immotile (%) <sup>g,h</sup> |                    | >935           |       |                                                        |                                                |
|                                                           | ≤2                 |                | ref   | ref                                                    | ref                                            |
|                                                           | 2-≤5               |                | 1%    | 0% (-5;7)                                              | 1% (-5;6)                                      |
|                                                           | >5                 |                | -8%   | -9% (-17;-1)                                           | -10% (-17;-1)                                  |
|                                                           | Per 1 mg/L nitrate |                | -1%   | -1% (-2;-0)                                            | -1% (-2;-0)                                    |
| <b>Testes volume</b>                                      |                    |                |       |                                                        |                                                |
| Average volume (mL) <sup>i</sup>                          |                    | >950           |       |                                                        |                                                |
|                                                           | ≤2                 |                | ref   | ref                                                    | ref                                            |
|                                                           | 2-≤5               |                | 1%    | 1% (-3;6)                                              | 2% (-3;7)                                      |
|                                                           | >5                 |                | 1%    | 1% (-6;9)                                              | 0% (-7;8)                                      |
|                                                           | Per 1 mg/L nitrate |                | 0%    | 0% (-1;1)                                              | 0% (-1;1)                                      |
| <b>Reproductive hormones</b>                              |                    |                |       |                                                        |                                                |
| Estradiol (pmol/L) <sup>j</sup>                           |                    | >950           |       |                                                        |                                                |
|                                                           | ≤2                 |                | ref   | ref                                                    | ref                                            |
|                                                           | 2-≤5               |                | -5%   | -4% (-11;3)                                            | -4% (-11;3)                                    |
|                                                           | >5                 |                | 9%    | 8% (-4;21)                                             | 9% (-3;23)                                     |
|                                                           | Per 1 mg/L nitrate |                | 1%    | 1% (0;2)                                               | 1% (0;2)                                       |

|                                                    |                    |      |      |               |               |
|----------------------------------------------------|--------------------|------|------|---------------|---------------|
| Follicle stimulating hormone (IU/L) <sup>j</sup>   |                    | >950 |      |               |               |
|                                                    | ≤2                 |      | ref  | ref           | ref           |
|                                                    | 2-≤5               |      | -1%  | -1% (-11;10)  | -1% (-12;11)  |
|                                                    | >5                 |      | -15% | -15% (-26;-1) | -14% (-26;-2) |
|                                                    | Per 1 mg/L nitrate |      | -1%  | -1% (-2%;1)   | 0% (-2%;1)    |
| Luteninizing hormone (IU/L) <sup>j</sup>           |                    | >950 |      |               |               |
|                                                    | ≤2                 |      | ref  | ref           | ref           |
|                                                    | 2-≤5               |      | -3%  | -2% (-8;5)    | -2% (-8;5)    |
|                                                    | >5                 |      | -8%  | -8% (-18;2)   | -7% (-17;3)   |
|                                                    | Per 1 mg/L nitrate |      | 0%   | 0% (-1;0)     | 0% (-1;1)     |
| Sex hormone binding globulin (nmol/L) <sup>j</sup> |                    | >950 |      |               |               |
|                                                    | ≤2                 |      | ref  | ref           | ref           |
|                                                    | 2-≤5               |      | -2%  | -1% (-6;4)    | -1% (-6;4)    |
|                                                    | >5                 |      | -9%  | -8% (-15;0)   | -8% (-16;0)   |
|                                                    | Per 1 mg/L nitrate |      | 0%   | 0% (-1;0)     | 0% (-1;0)     |
| Testosterone (nmol/L) <sup>j</sup>                 |                    | >950 |      |               |               |
|                                                    | ≤2                 |      | ref  | ref           | ref           |
|                                                    | 2-≤5               |      | -3%  | -2% (-6;3)    | -2% (-6;3)    |
|                                                    | >5                 |      | -3%  | -3% (-9;3)    | -2% (-8;4)    |
|                                                    | Per 1 mg/L nitrate |      | 0%   | 0% (0;1)      | 0% (0;1)      |
| Free androgen index (%) <sup>j</sup>               |                    | >950 |      |               |               |
|                                                    | ≤2                 |      | ref  | ref           | ref           |
|                                                    | 2-≤5               |      | 3%   | 2% (-4;8)     | 2% (-4;9)     |
|                                                    | >5                 |      | 6%   | 2% (-5;11)    | 4% (-3;13)    |
|                                                    | Per 1 mg/L nitrate |      | 0%   | 0% (0;1)      | 0% (0;1)      |

a: rounded down to the nearest fifth due to local regulations. b: adjusted for maternal age at delivery, maternal smoking during 1st trimester and highest educational level of parents. c: further adjusted for maternal pre-pregnancy body mass index. d: further adjusted for population density (numbers of neighbors residing within 250 meters of the maternal residential address). e: excluding samples with spillage and further adjusted for abstinence time and place at semen sample collection; at home/at the clinic. f: further adjusted for spillage, abstinence time and place at semen sample collection; at home/at the clinic. g: excluding samples from participants with azoospermia. Further adjusted for spillage, abstinence time and place at semen sample collection; at home/at the clinic. h: further adjusted for interval from ejaculation to analyses of semen sample. i: further adjusted for abstinence time. j: further adjusted for time at the day for collection of blood sample
